# Supplementary figures and images for: In Vivo Efficacy of Amphotericin B against Four Candida auris Clades
Source: MDPI journal article supplement (doi:10.3390/jof8050499), 2022-05-11

**A**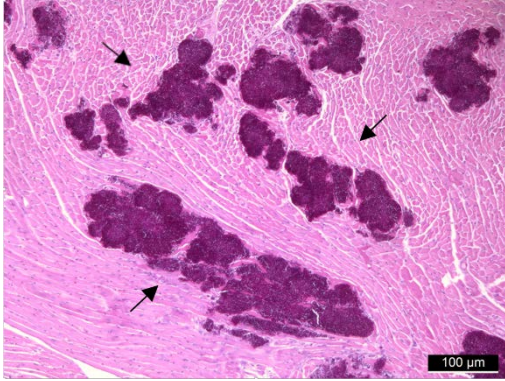**B**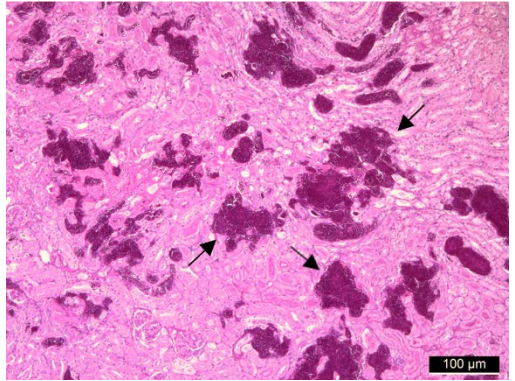**C**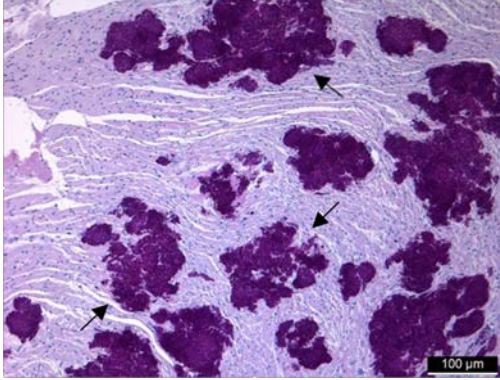**D**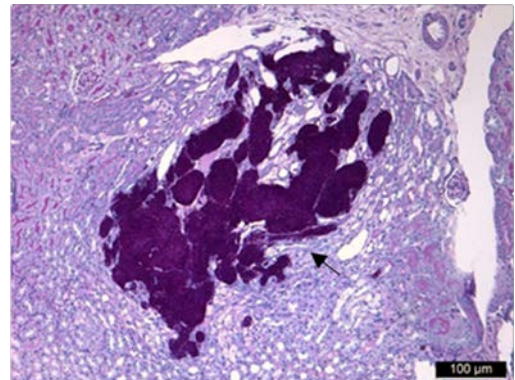**E**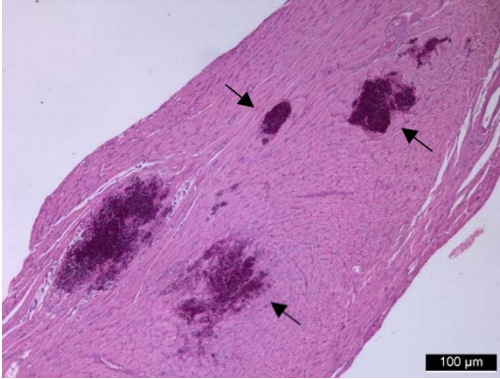**F**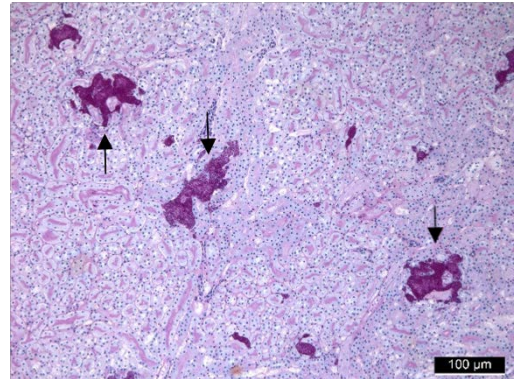**G**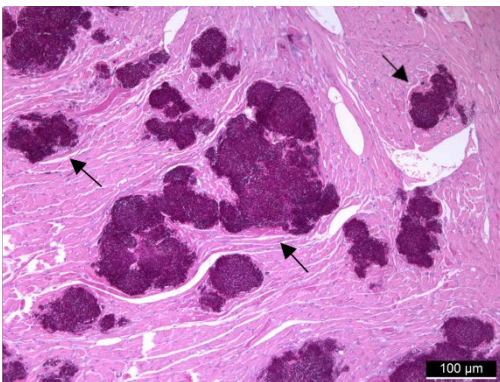**H**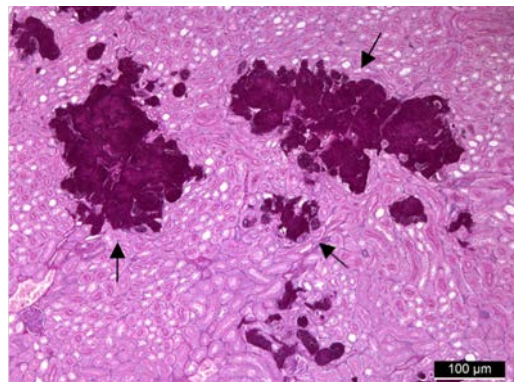

Supplement: s1 [file s1]
